# Supplementary material for: Common Genetic Variants Modulate the Electrocardiographic Tpeak-to-Tend Interval
Source: PubMed Central journal article supplement (PMC7273524; doi:10.1016/j.ajhg.2020.04.009), 2020-05-07
Supplement: mmc1.pdf [file mmc1.pdf]

**The American Journal of Human Genetics, Volume 106**

**Supplemental Data**

**Common Genetic Variants Modulate  
the Electrocardiographic Tpeak-to-Tend Interval**

**Julia Ramírez, Stefan van Duijvenboden, William J. Young, Michele Orini, Pier D. Lambiase, Patricia B. Munroe, and Andrew Tinker**

## Supplemental Figures

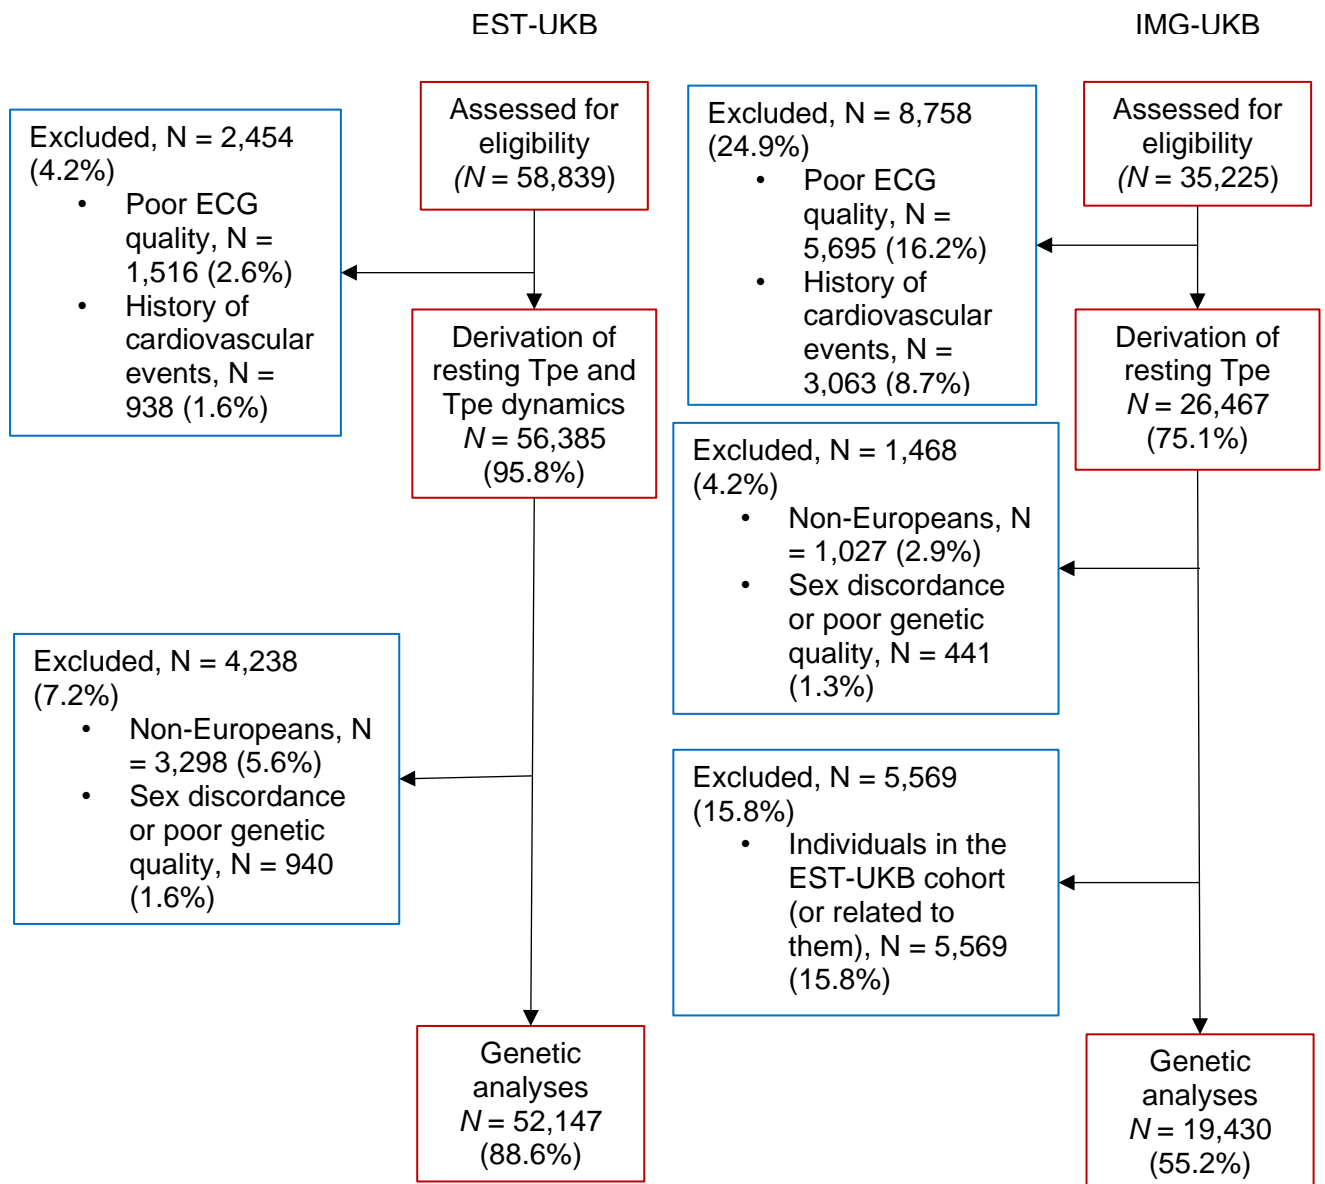

**Figure S1: Exercise stress test (EST-UKB) and Imaging (IMG-UKB) study populations flow diagram.**

Additional information can be found in Methods.

## FULL-UKB cohort

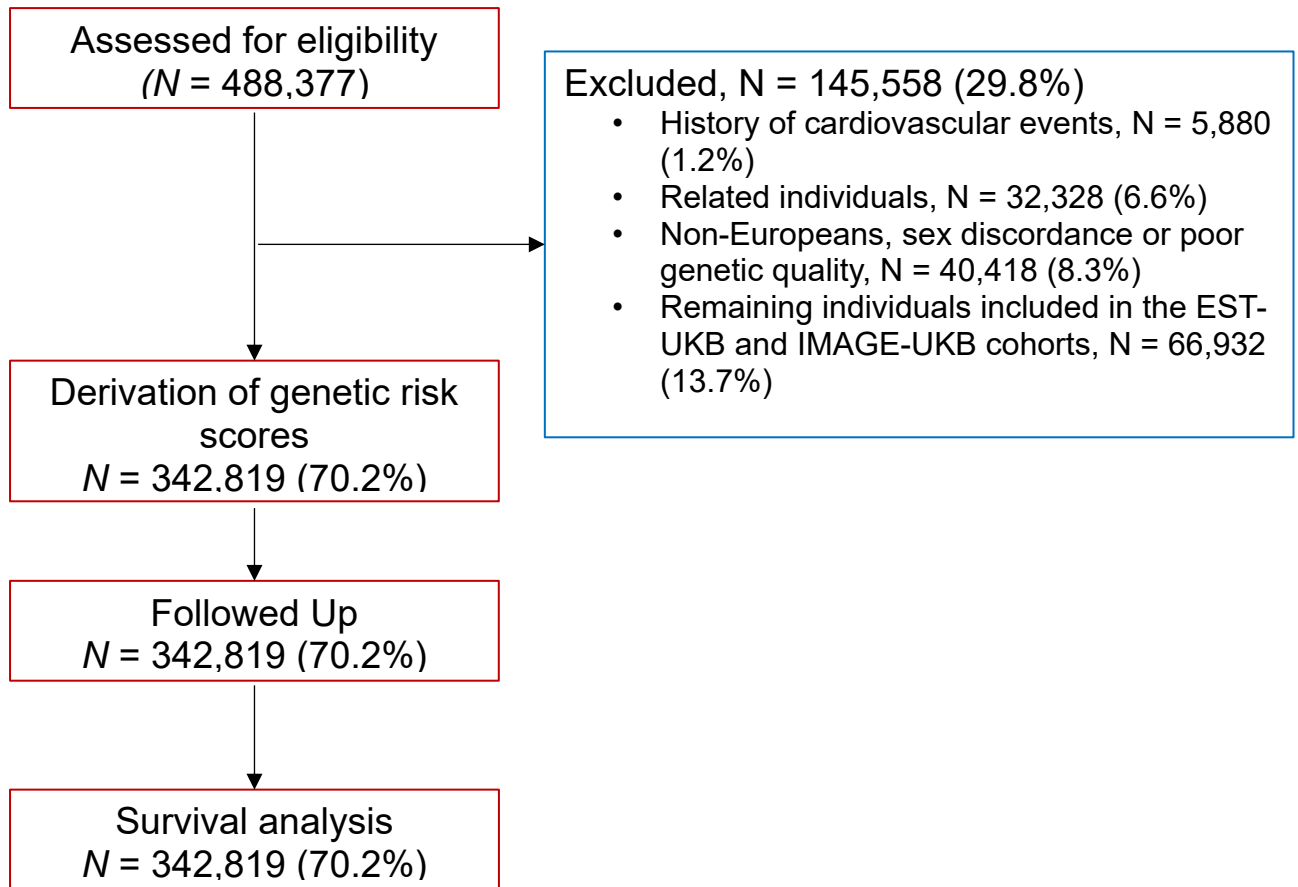

Figure S2: Full cohort (FULL-UKB) study population flow diagram.

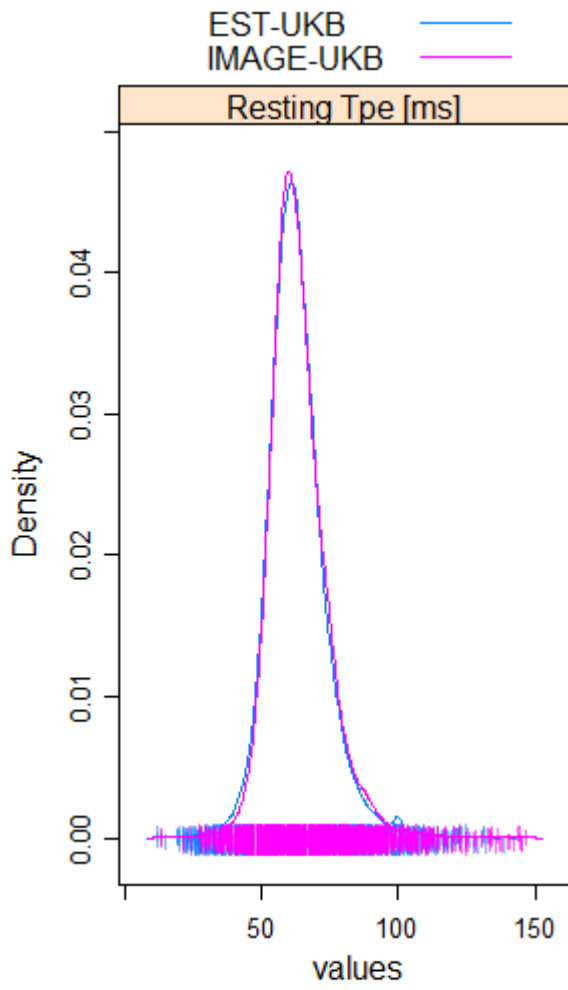

**Figure S3: Density plots of resting Tpe intervals in the EST-UKB (blue) and IMAGE-UKB (pink) cohorts.**

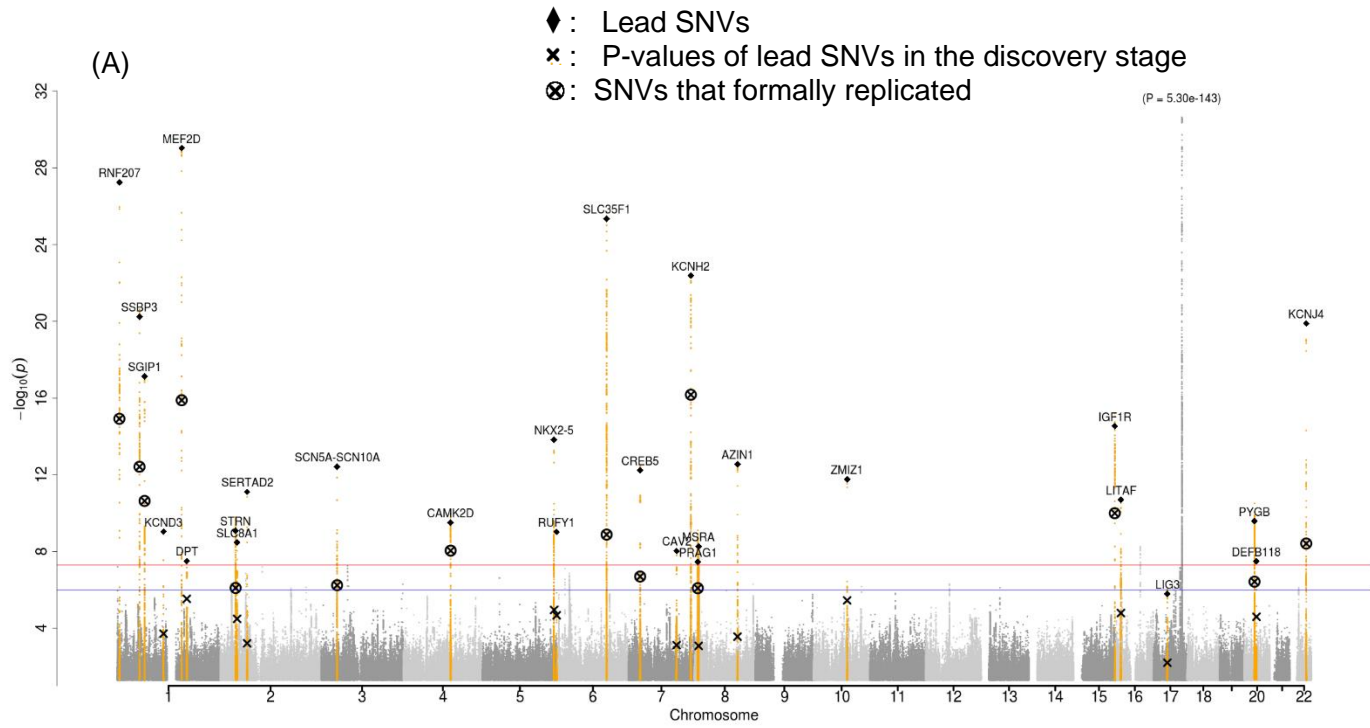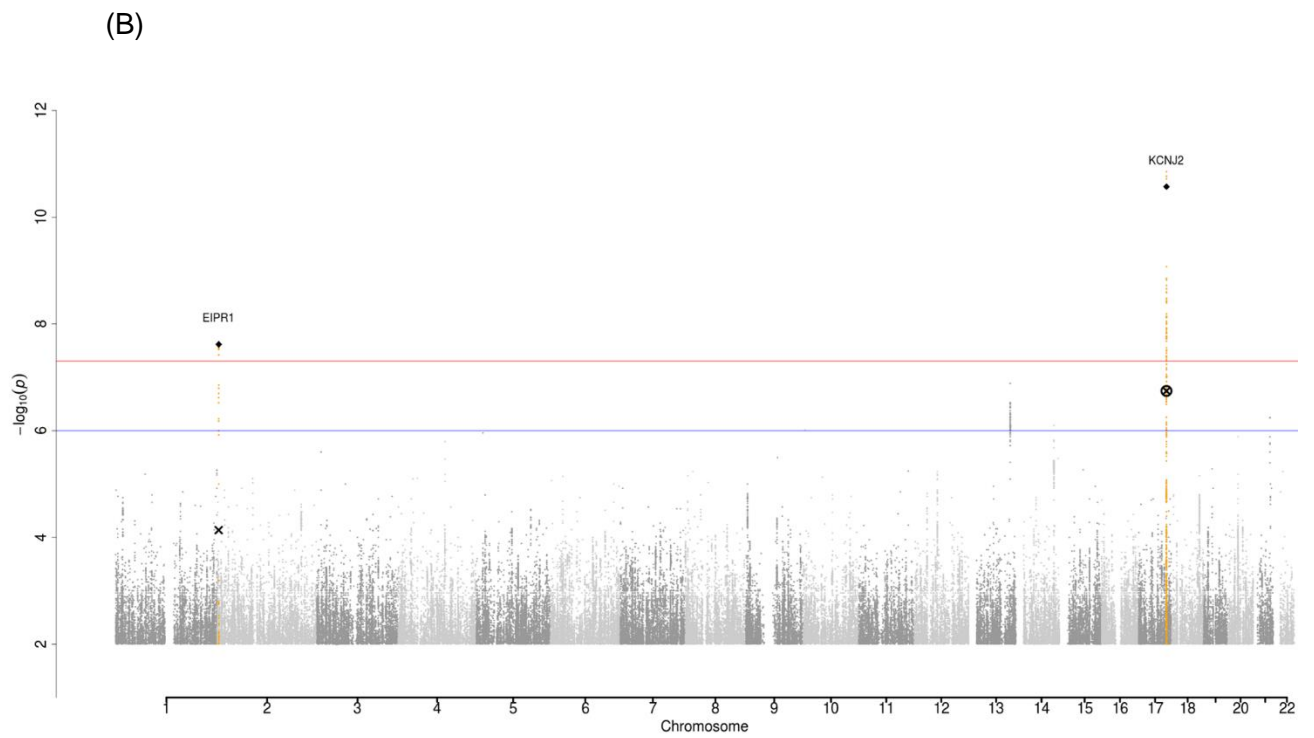

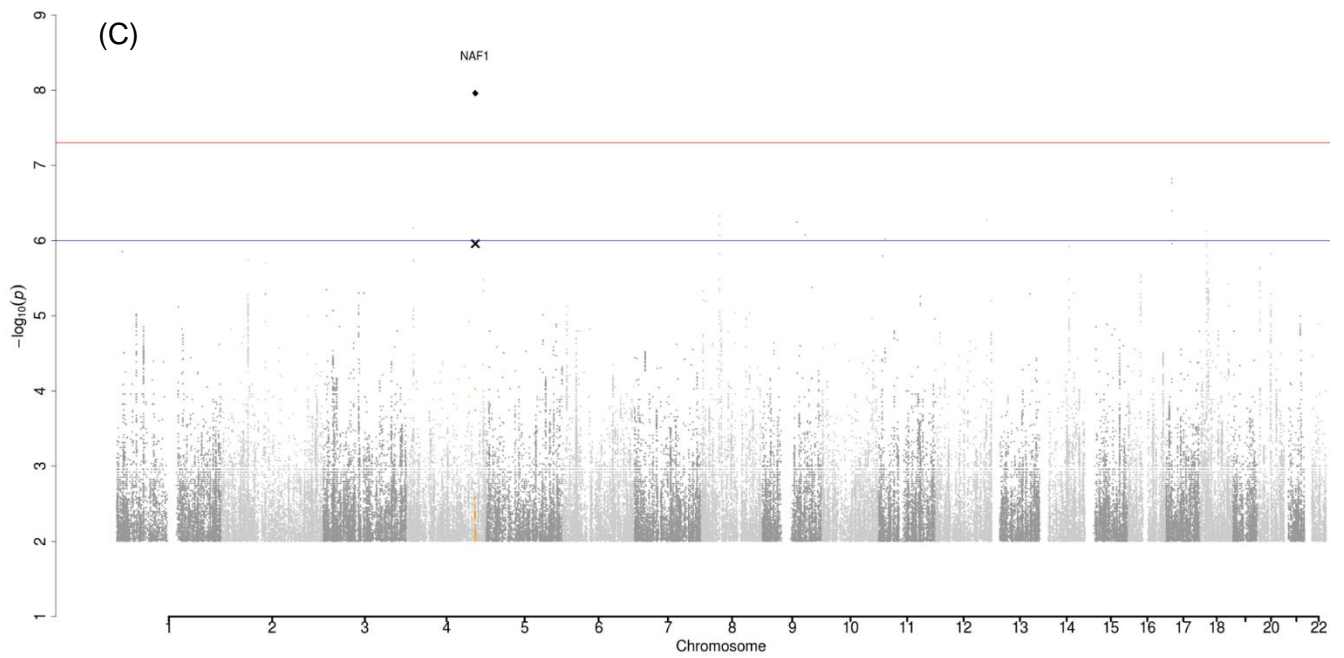

**Figure S4: Manhattan plots of Tpe interval (A), Tpe dynamics during exercise (B) and during recovery (C) in the full cohort analysis.**

$P$  values, expressed as  $-\log_{10}(P)$ , are plotted according to physical genomic locations by chromosome. Lead SNVs are marked by the diamonds. The crosses indicate the  $P$  values of these SNVs in the discovery data set. Crosses are encircled for SNVs that formally replicated. Locus names of the novel loci correspond to the nearest annotated gene. The blue horizontal line indicates a  $P$  value threshold of  $1 \times 10^{-6}$ , corresponding to the lookup significance threshold. The red horizontal line indicates a  $P$ -value threshold of  $5 \times 10^{-8}$ , corresponding to genome-wide significance. Novel loci are highlighted in yellow.

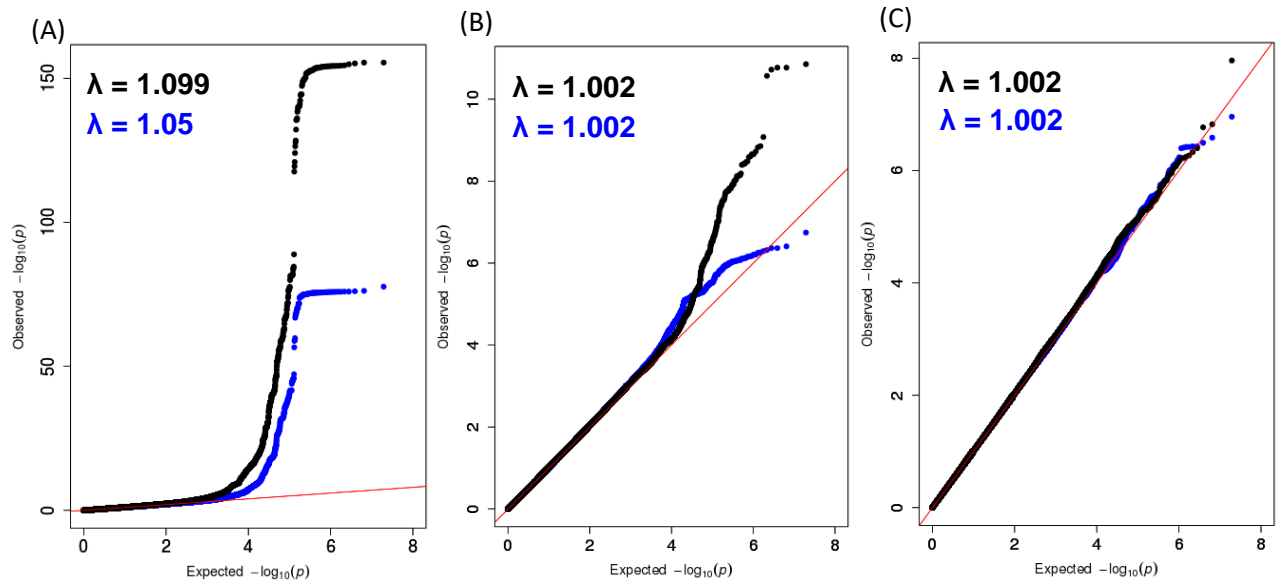

**Figure S5: QQ plots for Tpe interval (A), Tpe dynamics during exercise (B) and Tpe dynamics during recovery (C) in the discovery (blue) and full (black) cohorts.**

rs10864434

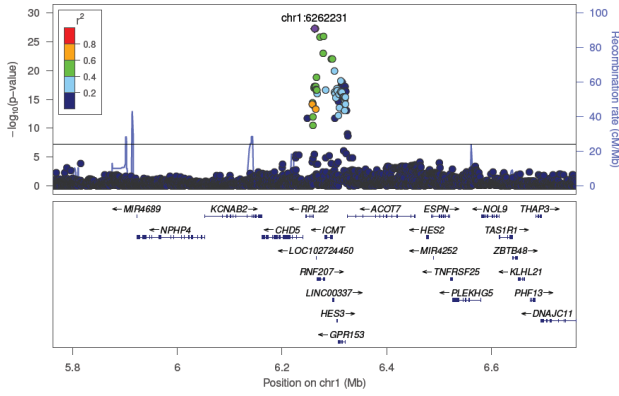

rs603901

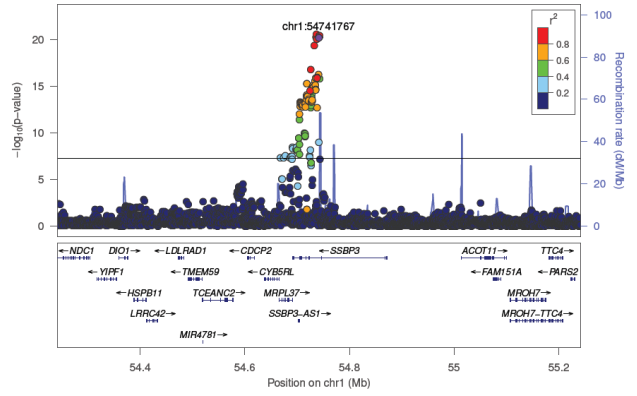

rs10789207

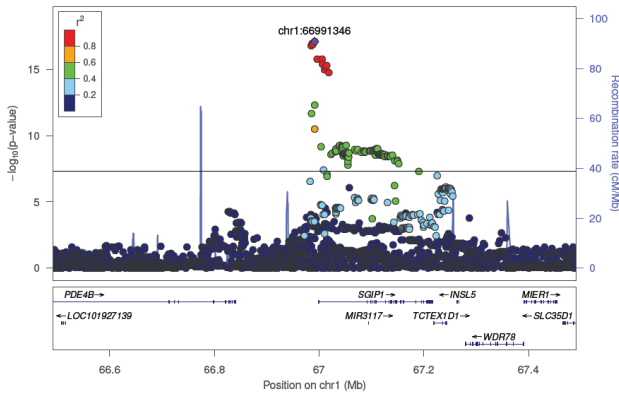

rs116532272

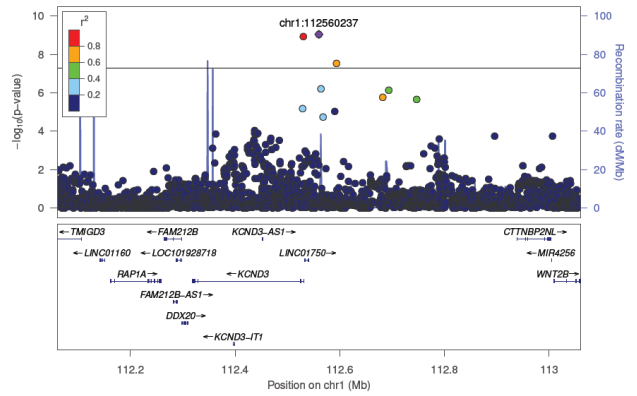

rs1050316

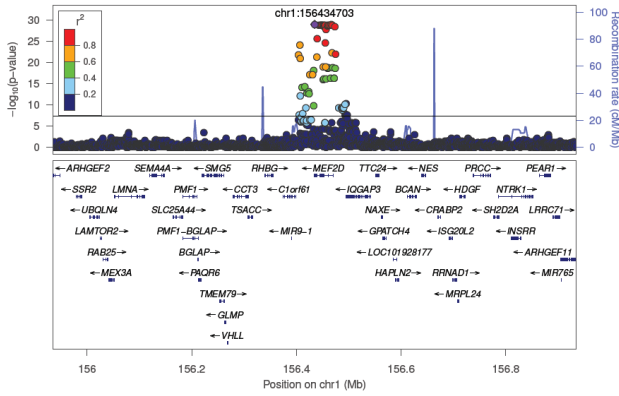

rs607484

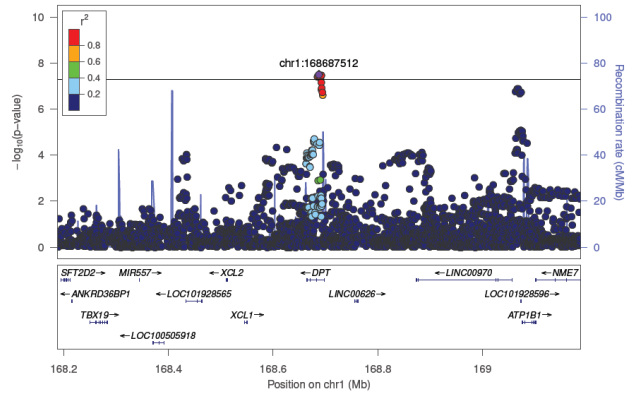

rs3770774

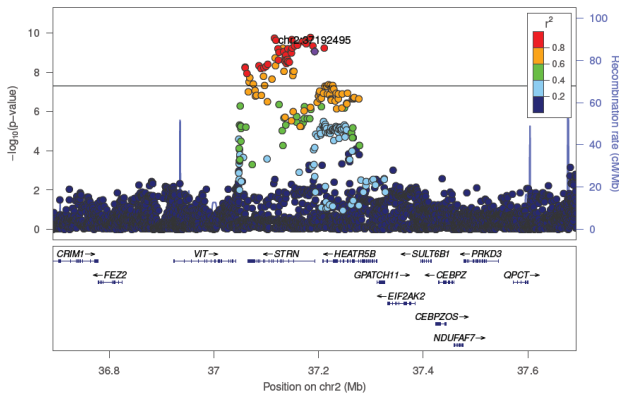

rs35450971

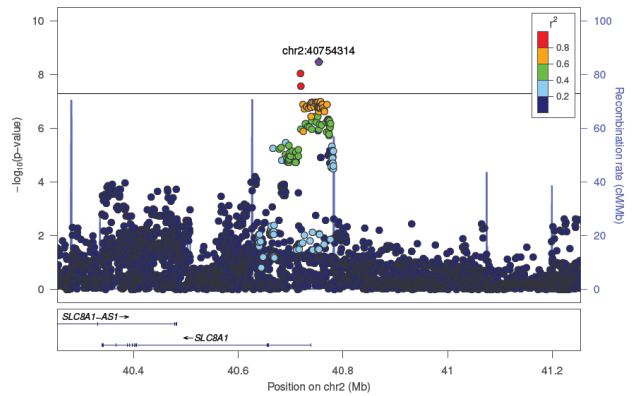



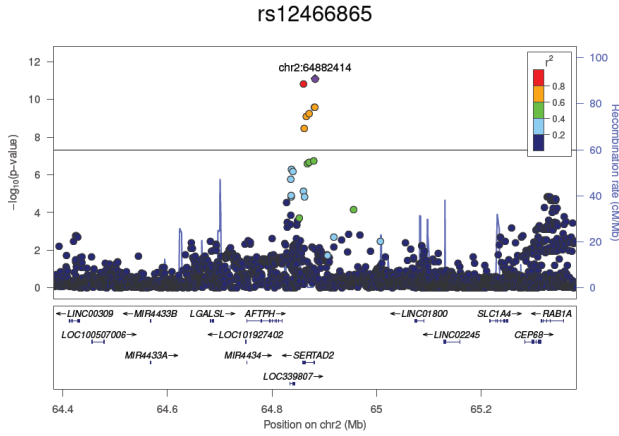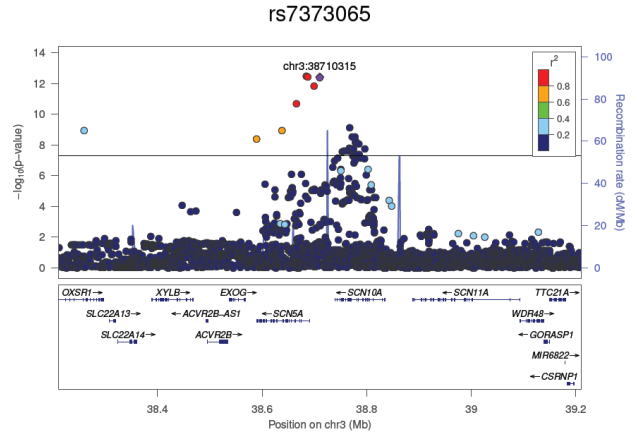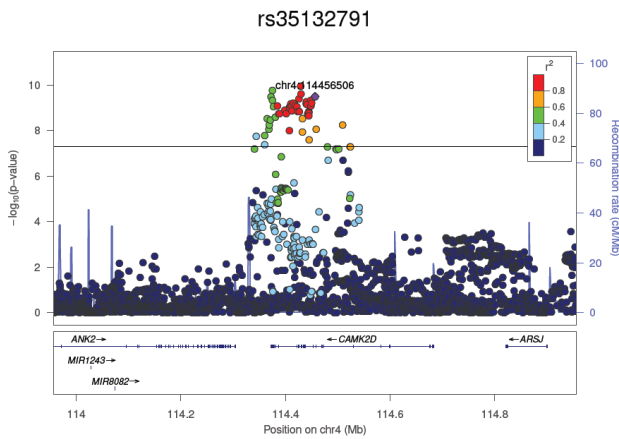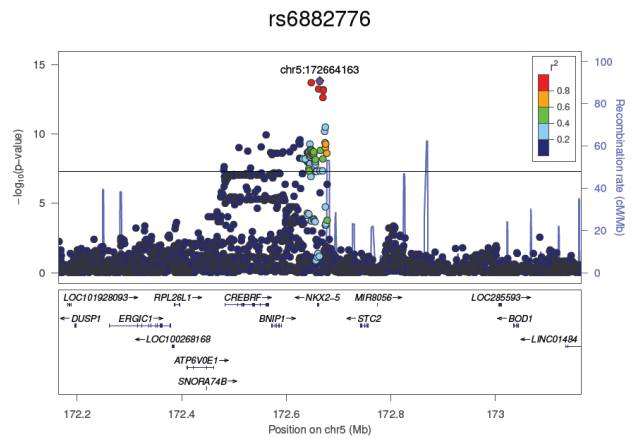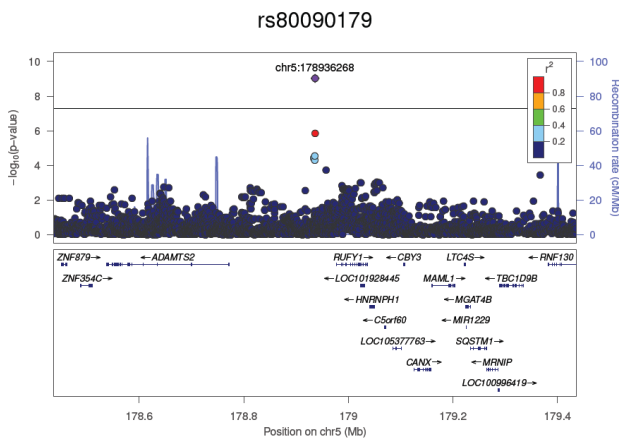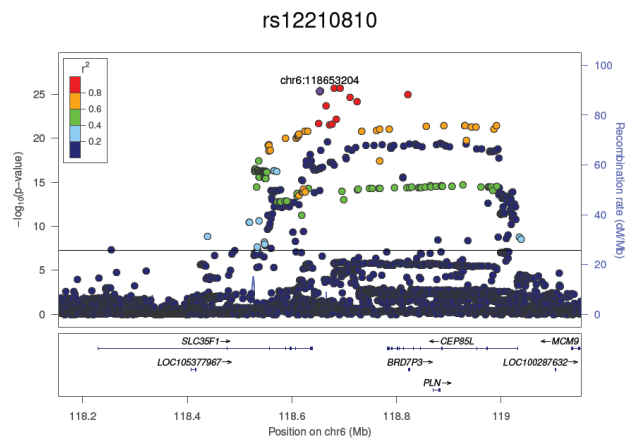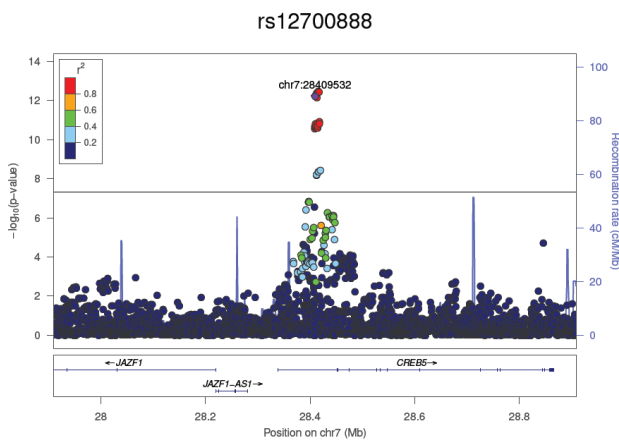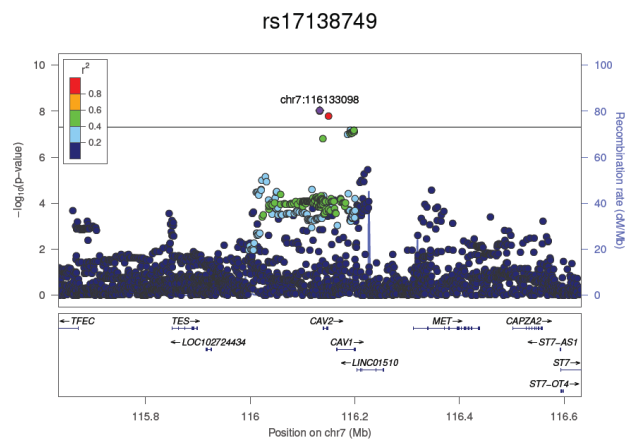

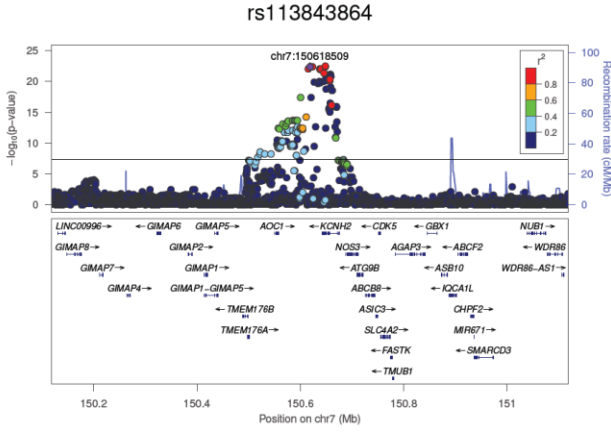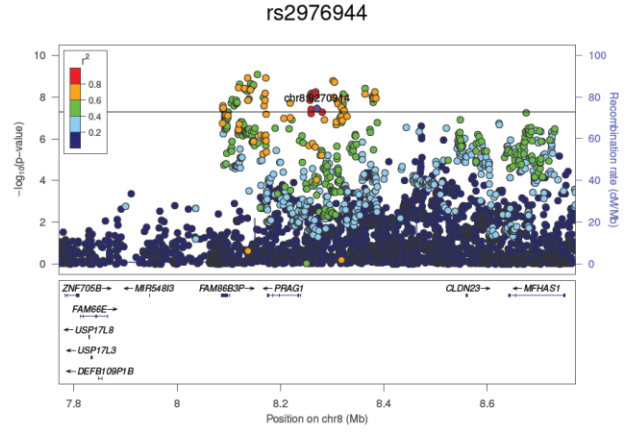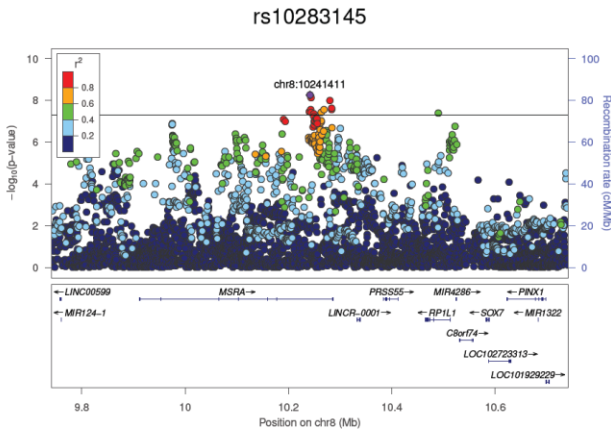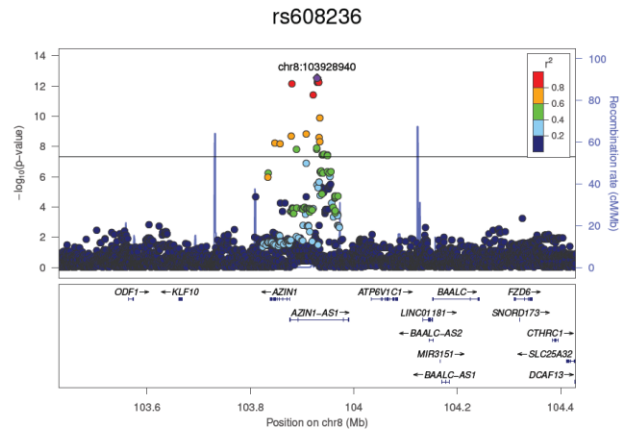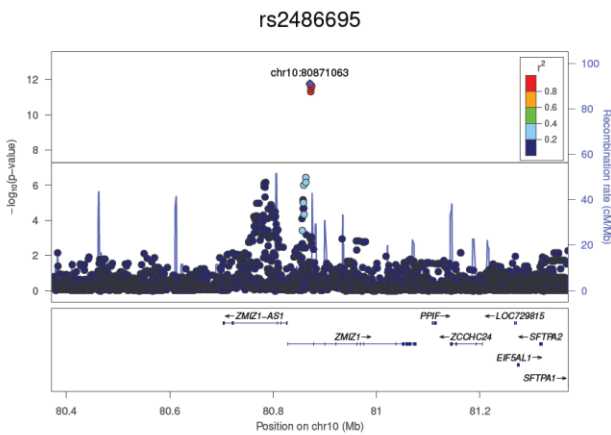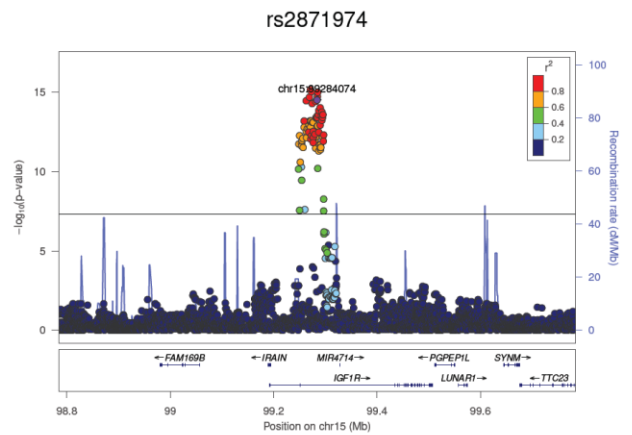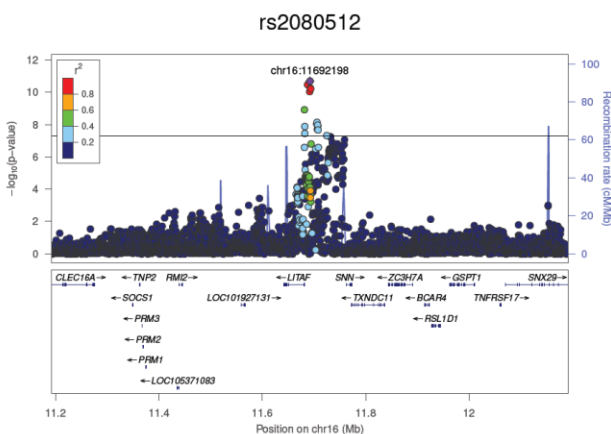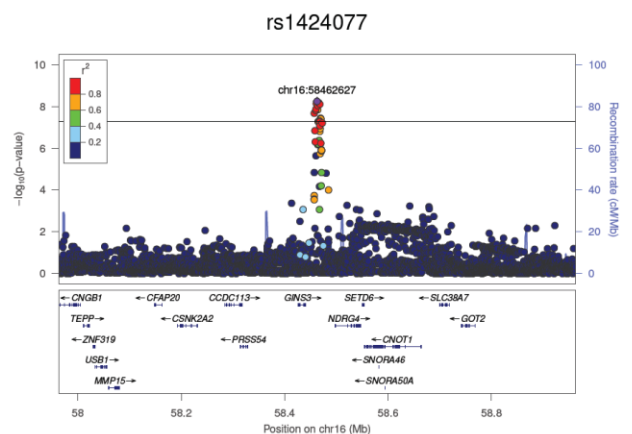

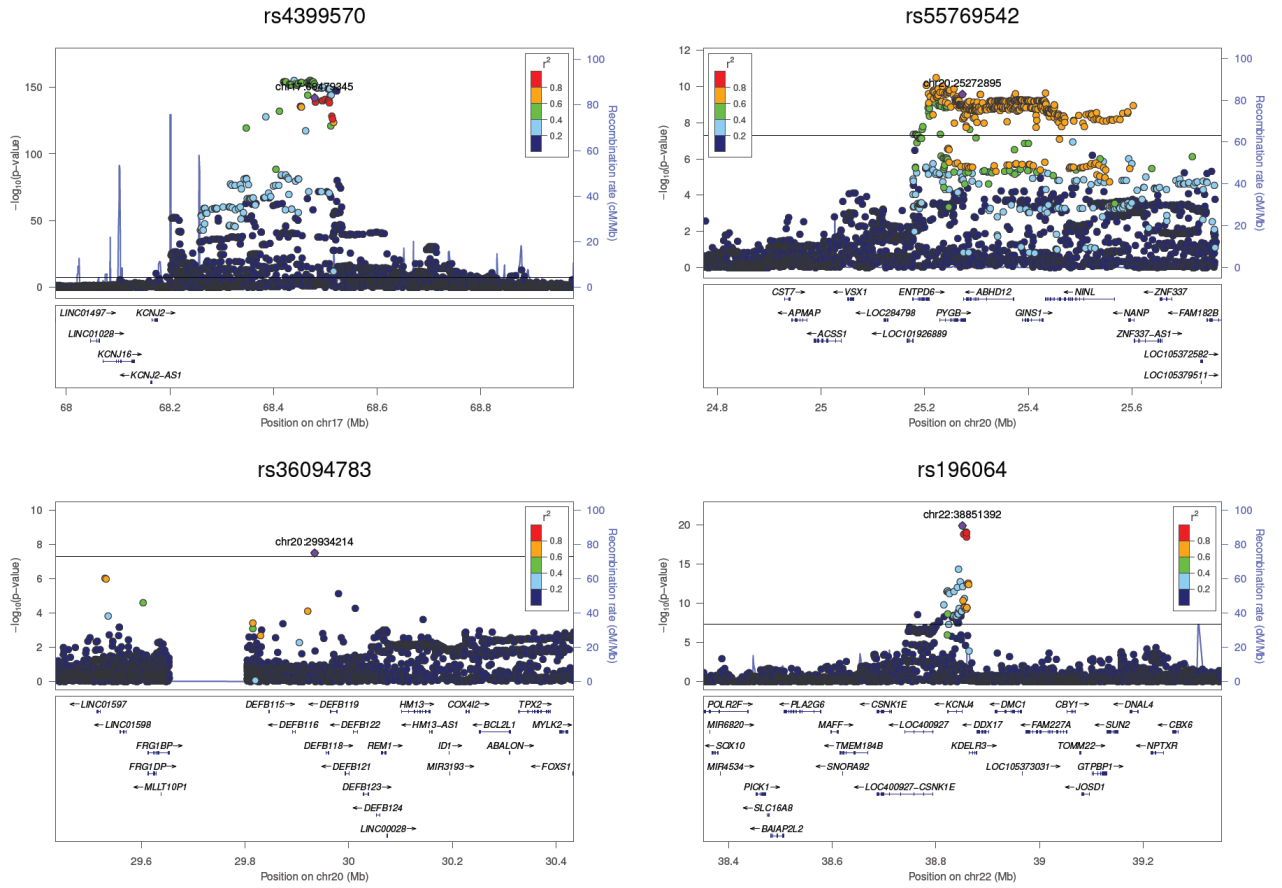

**Figure S6: Locus Zoom plots for the twenty-eight (ordered by chromosome and base pair position) identified lead SNVs for resting Tpe.**

rs607484

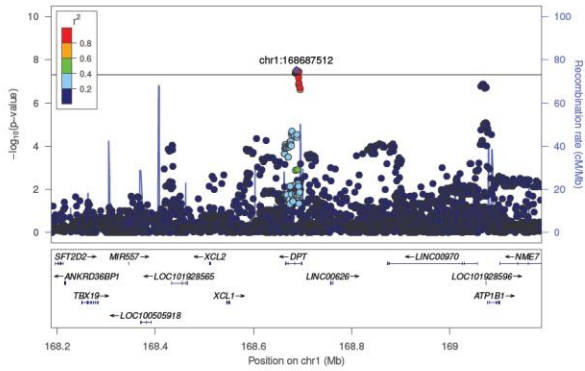

rs761499672

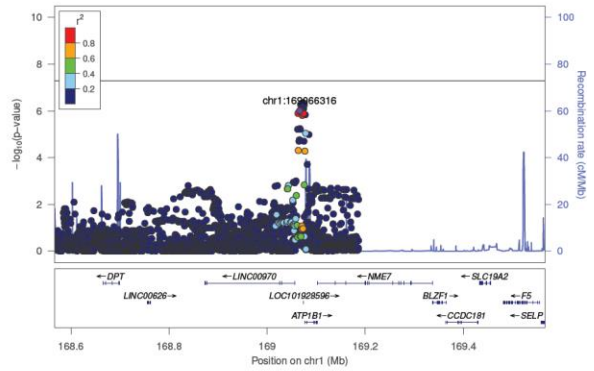

rs7373065

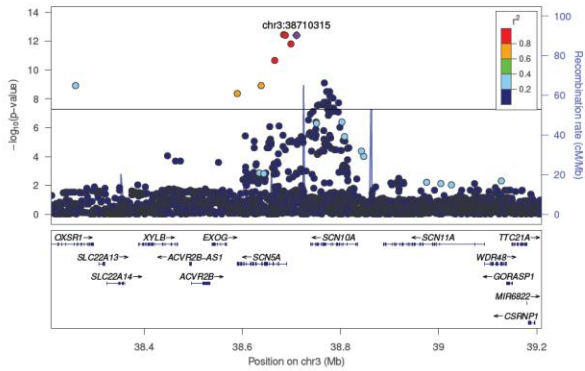

rs6801957

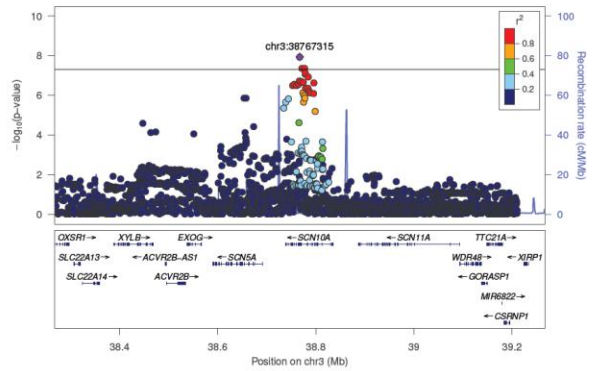

rs2080512

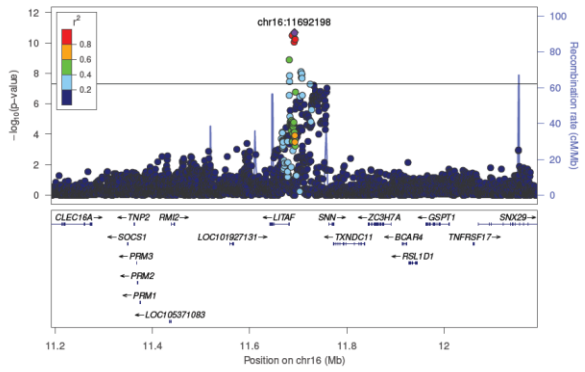

rs570620219

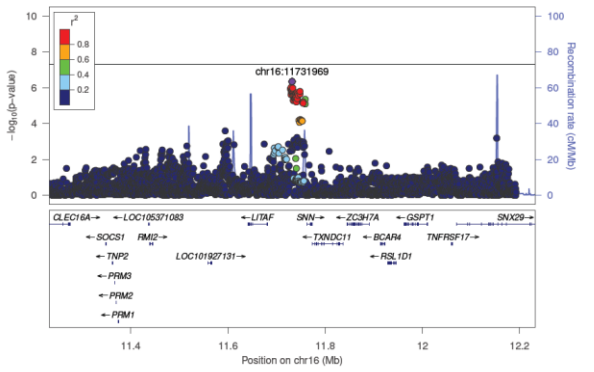

rs7373065

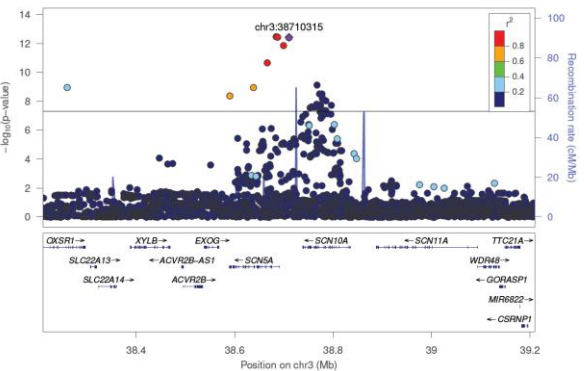

rs6801957

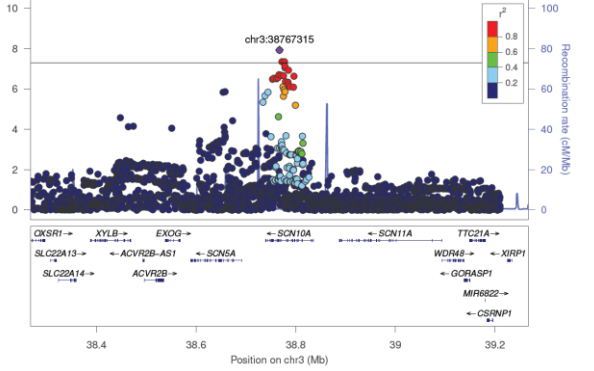

**Figure S7: Locus Zoom plots for the four loci with secondary signals for resting Tpe.**

Left: lead SNV. Right: LZ plot conditioned on the lead SNV.

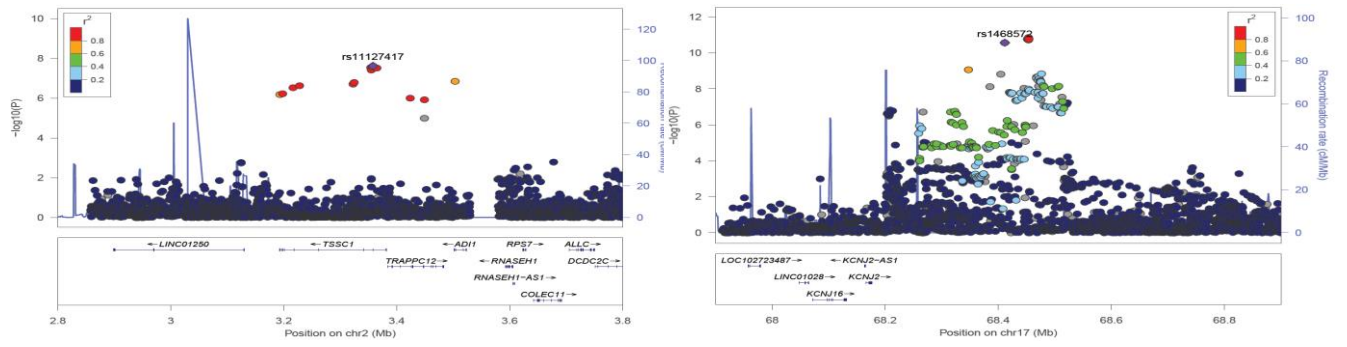

**Figure S8: Locus Zoom plots for the identified loci for Tpe dynamics during exercise.**

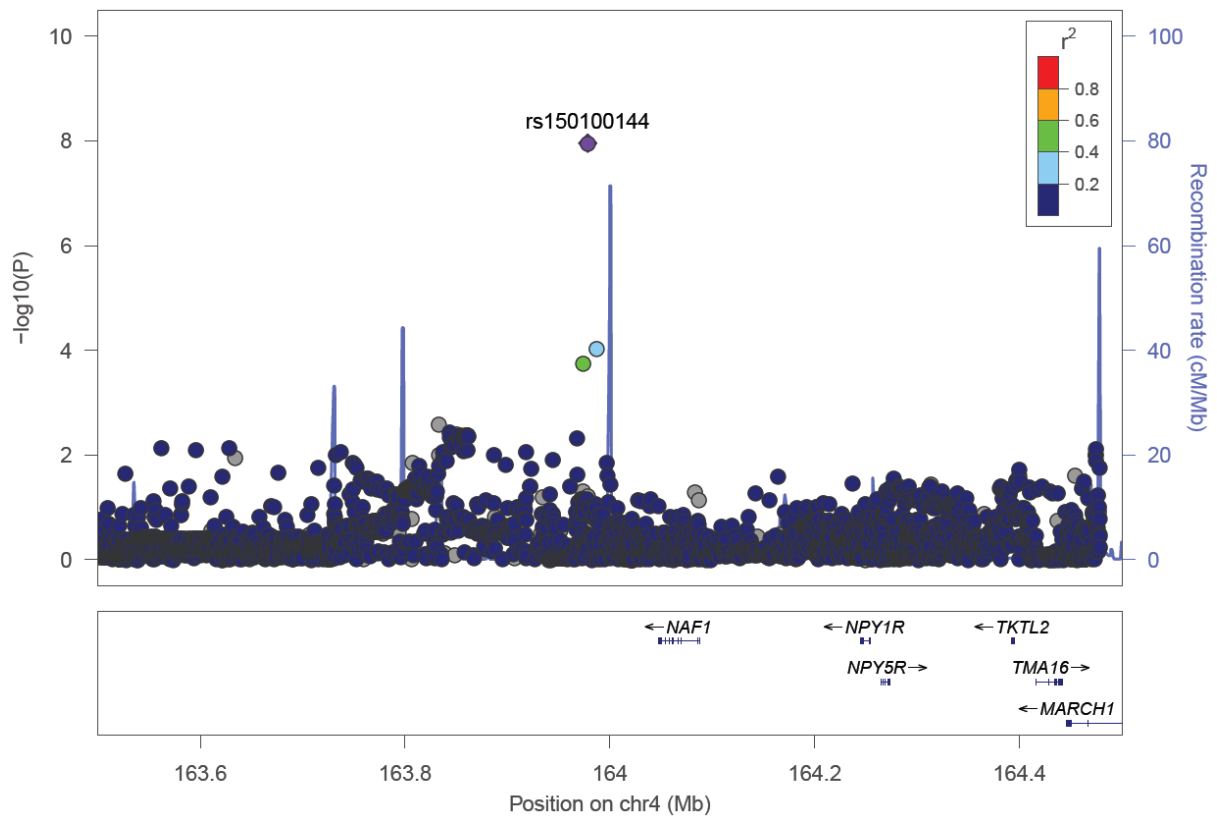

**Figure S9: Locus Zoom plots for the identified locus for Tpe dynamics during recovery.**

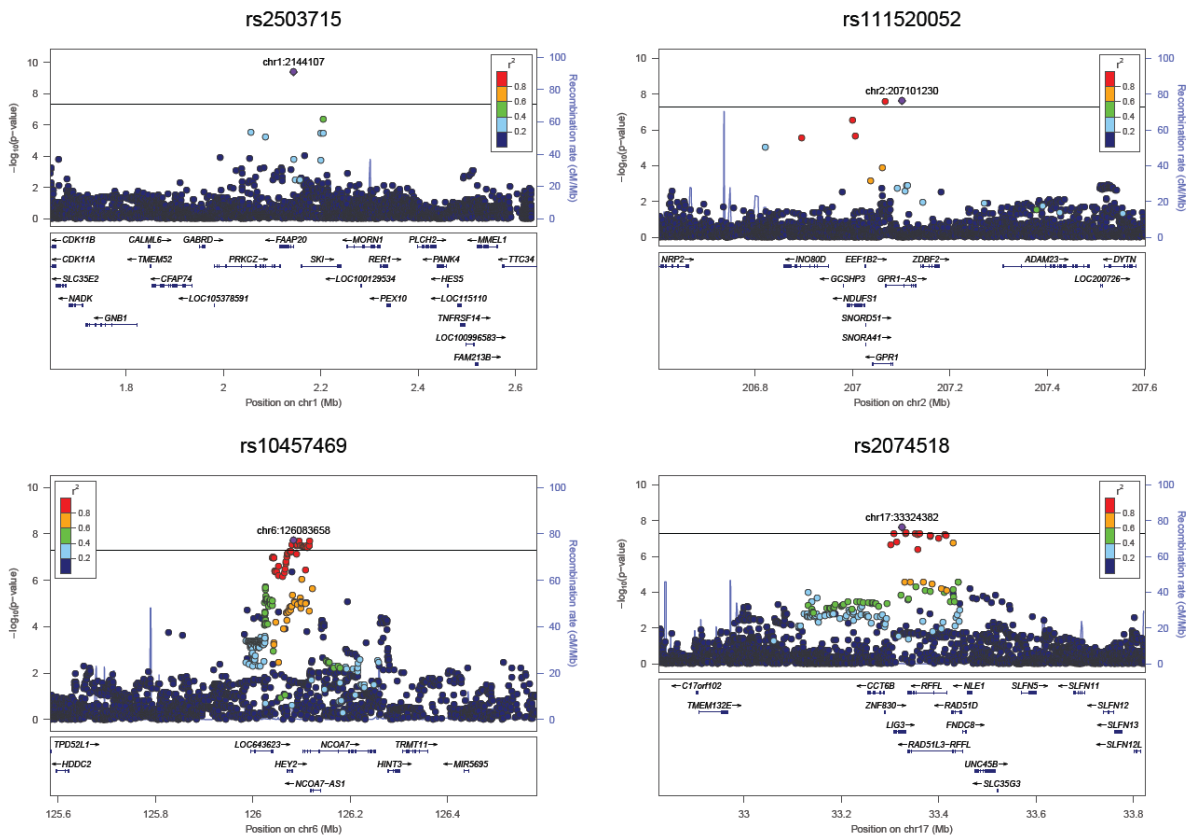

**Figure S10: Locus Zoom plots for the male-specific loci for resting Tpe (males only summary statistics).**



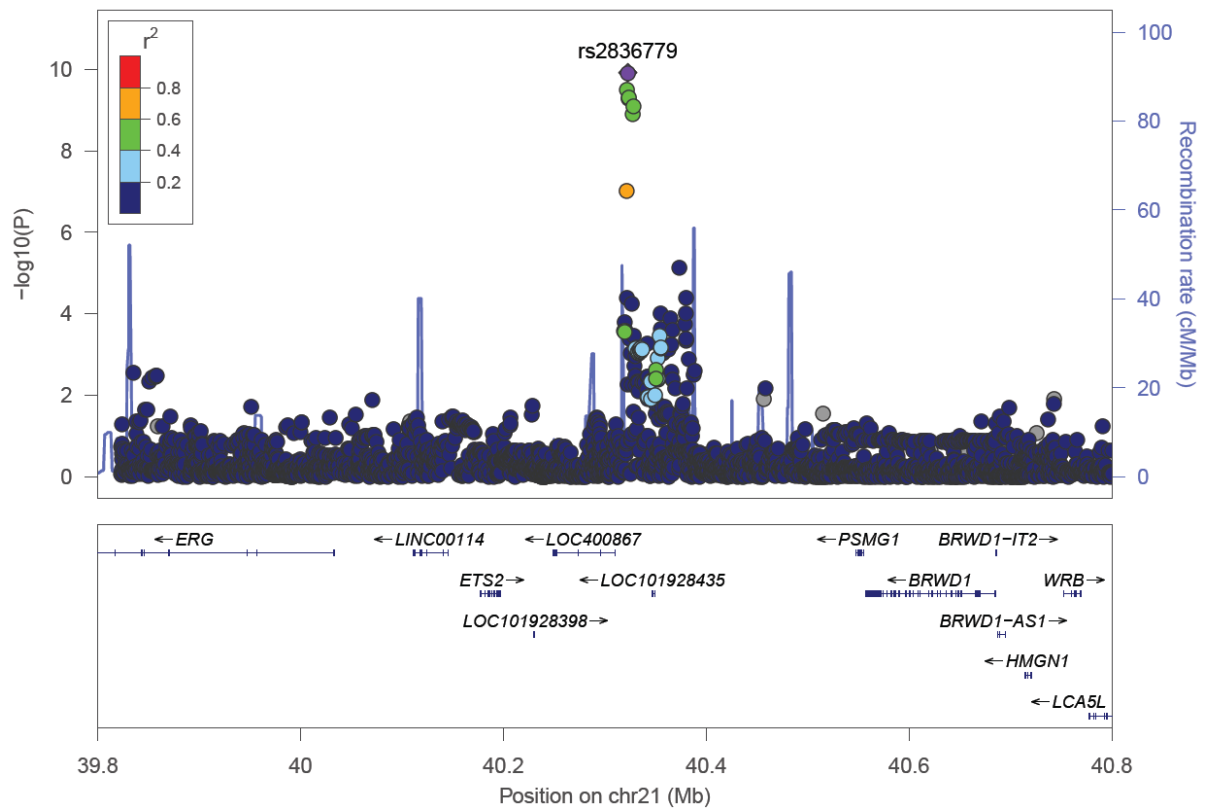

**Figure S11: Locus Zoom plots for the sex-specific locus for Tpe dynamics during exercise (males only summary statistics).**

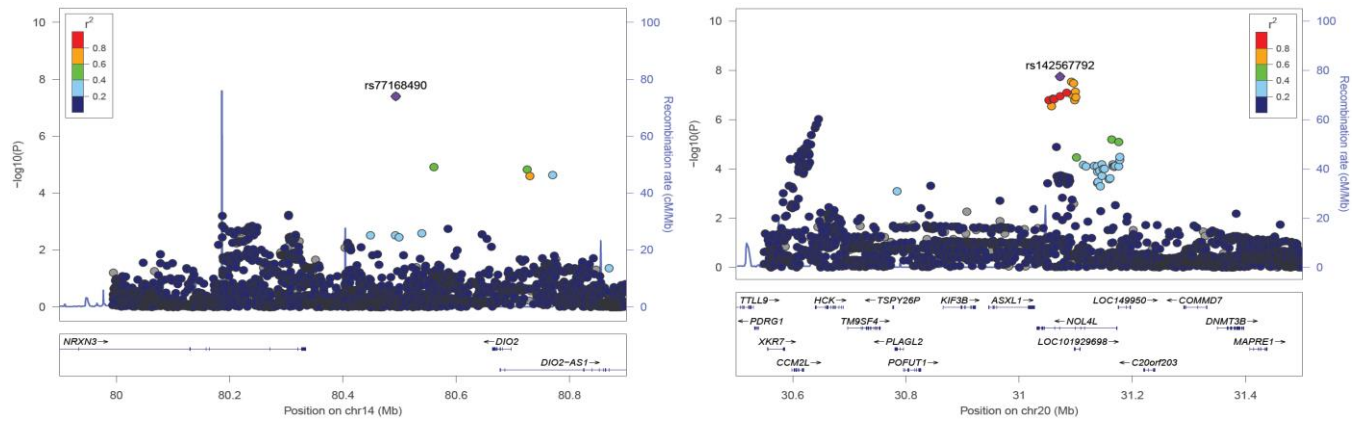

**Figure S12: Locus Zoom plots for the sex-specific loci for Tpe dynamics during recovery (females only summary statistics).**

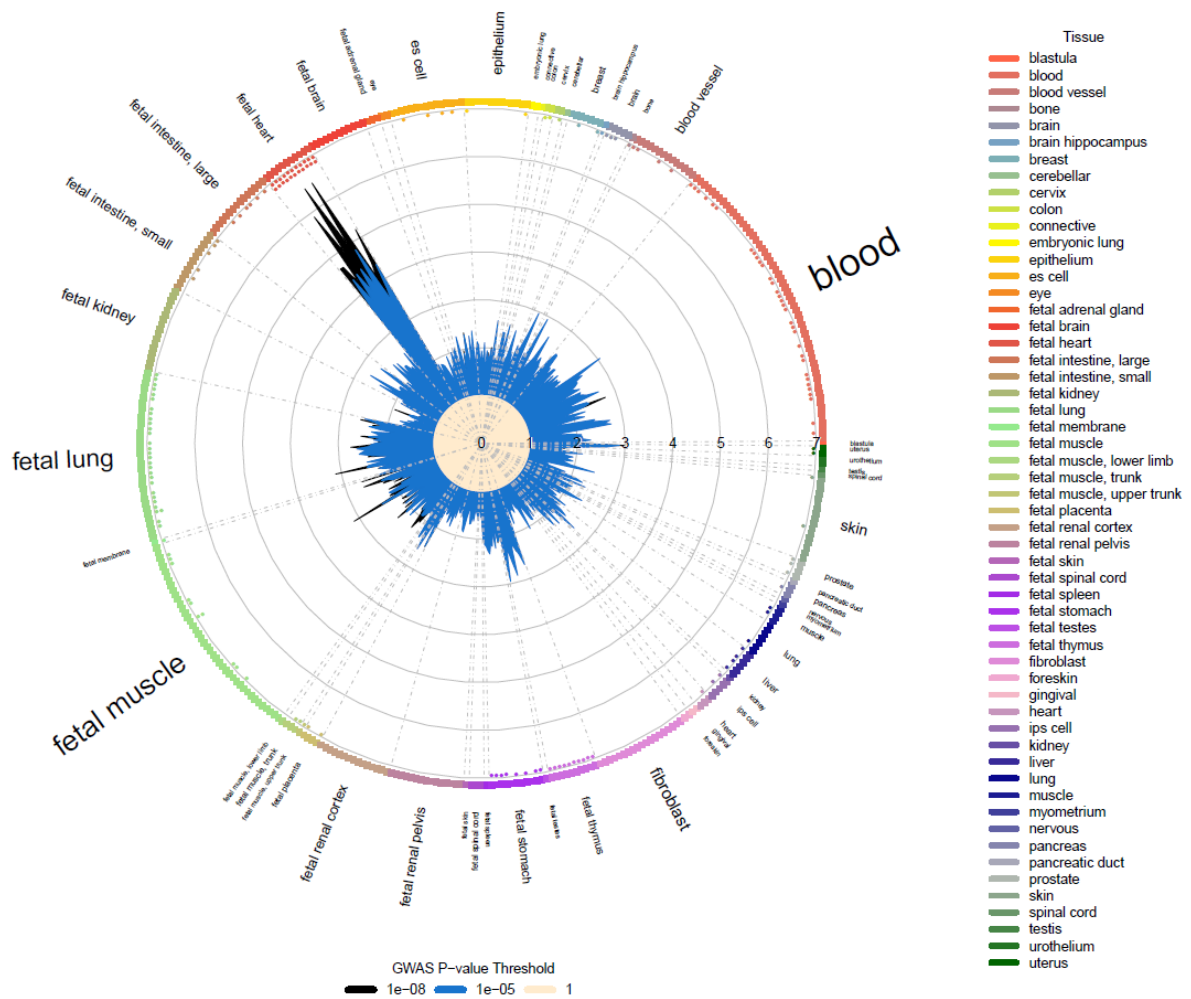

**Figure S13: Functional enrichment analysis of resting Tpe loci within DNaseI hypersensitivity spots.**

The radial lines show fold enrichment (FE) at eight GWA  $P$ -value thresholds. The results are shown for each of 424 cell types which are sorted by tissue, represented along the outer circle of the plot. The font size is proportional to the number of cell types from the tissue. FE values are plotted with different colours with respect to different GWA thresholds. Significant enrichment for a given cell type is denoted along the outer circle of the plot from a GWA  $P$ -value threshold.

| source | term name                                                                    | term ID         | n. of term genes | n. of query genes | n. of common genes | corrected p-value | ETS2<br>KCNJ2<br>EPRI1 |
|--------|------------------------------------------------------------------------------|-----------------|------------------|-------------------|--------------------|-------------------|------------------------|
| cor    | ETS2-ETS1 complex                                                            | CORUM:2790      | 2                | 1                 | 1                  | 3.11e-03          | 03                     |
| cor    | ETS2-ERG complex                                                             | CORUM:2789      | 2                | 1                 | 1                  | 3.11e-03          | 03                     |
| cor    | ETS2-SMARCA4-INI1 complex                                                    | CORUM:5293      | 3                | 1                 | 1                  | 4.66e-03          | 03                     |
| cor    | ETS2-FOS-JUN complex                                                         | CORUM:2695      | 3                | 1                 | 1                  | 4.66e-03          | 03                     |
| rea    | Classical Kir channels                                                       | R-HSA-1296053   | 4                | 2                 | 1                  | 1.51e-02          | r                      |
| mir    | hsa-miR-196b-5p                                                              | hsa-miR-196b-5p | 151              | 3                 | 2                  | 1.93e-02          | mi mi                  |
| mir    | hsa-miR-3646                                                                 | hsa-miR-3646    | 199              | 3                 | 2                  | 3.35e-02          | mi mi                  |
| BP     | regulation of skeletal muscle contraction by action potential                | GO:0100001      | 1                | 2                 | 1                  | 3.77e-02          | r                      |
| BP     | regulation of skeletal muscle contraction via regulation of action potential | GO:0014861      | 1                | 2                 | 1                  | 3.77e-02          | r                      |

The colors for different evidence codes in the table:

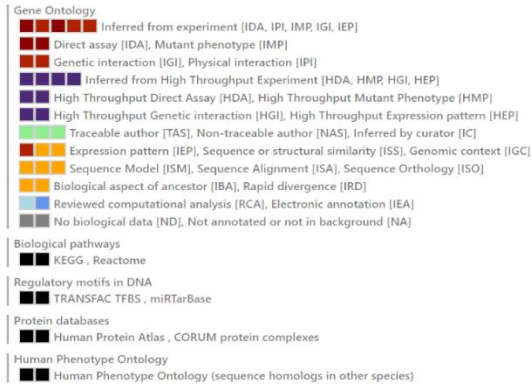

The colors for log scale:

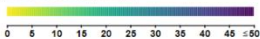

**Figure S14: Top biological processes enrichment of candidate genes at Tpe dynamics during exercise loci.**

g:profiler GO (gene ontology) term enrichment was performed using the candidate genes for Tpe dynamics during exercise.

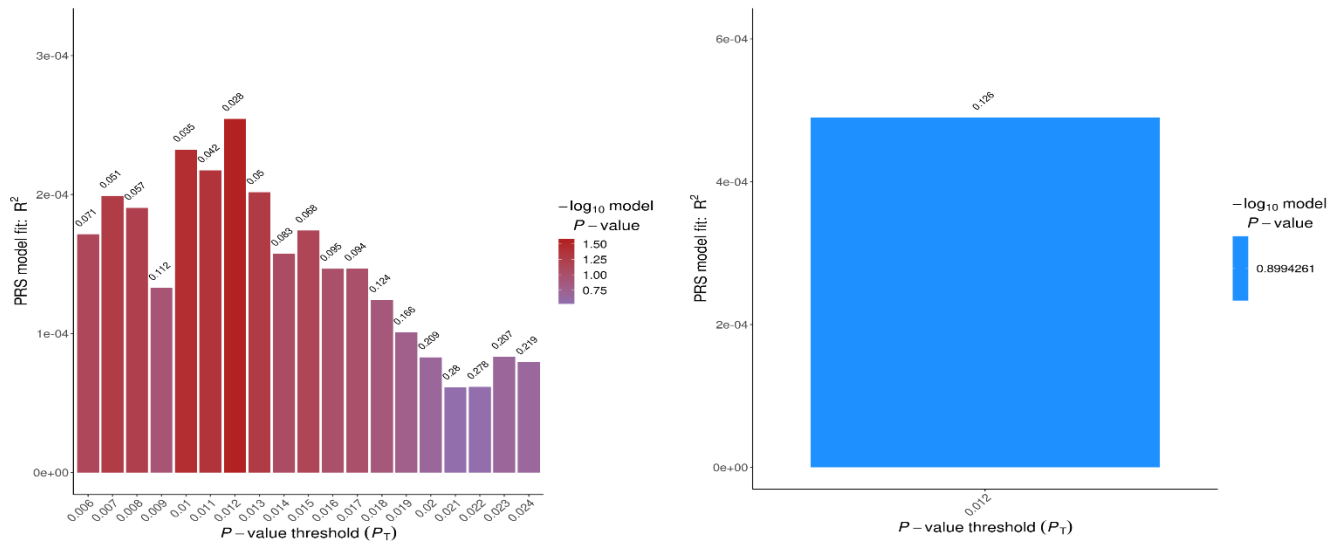

**Figure S15:** Left, adjusted R-squared versus the  $P$ -value threshold in the training subset ( $N = 247,256$ ). The optimal cut-off value is the one for which the adjusted R-squared is highest and the  $P$ -value is lowest ( $P = 0.012$ ). Right, adjusted R-squared and  $P$ -value of the logistic regression in the validation set ( $N = 68,563$ ) using the optimal cut-off value.

**Supplemental Tables**

| <b>Locus</b>  | <b>SNV</b>         | <b>CH</b><br><b>R</b> | <b>BP</b>     | <b>E</b><br><b>A</b> | <b>MA</b><br><b>F</b> | <b>Reporte</b><br><b>d P</b> | <b>P in our</b><br><b>study</b> | <b>N</b>  | <b>β</b><br><b>(ms)</b> | <b>PMID</b>  |
|---------------|--------------------|-----------------------|---------------|----------------------|-----------------------|------------------------------|---------------------------------|-----------|-------------------------|--------------|
| <i>NOS1AP</i> | rs288<br>0058      | 1                     | 162014<br>632 | A                    | -                     | 1.00E-<br>02                 | 2.90E-03                        | 5,8<br>90 | -0.6                    | 20215<br>044 |
|               | rs465<br>7139      | 1                     | 162029<br>907 | T                    | -                     | 3.00E-<br>02                 | 9.60E-04                        | 5,8<br>90 | -0.5                    | 20215<br>044 |
|               | rs109<br>1859<br>4 | 1                     | 162030<br>688 | C                    | -                     | 2.00E-<br>03                 | 1.40E-03                        | 5,8<br>90 | -0.8                    | 20215<br>044 |
|               | rs104<br>9436<br>6 | 1                     | 162085<br>685 | T                    | -                     | 2.00E-<br>02                 | 1.70E-04                        | 5,8<br>90 | -0.6                    | 20215<br>044 |
| <i>KCNH2</i>  | rs180<br>5123      | 7                     | 150645<br>534 | A                    | -                     | 5.00E-<br>05                 | 4.30E-22                        | 5,8<br>90 | -1.2                    | 20215<br>044 |
|               | rs380<br>7375      | 7                     | 150667<br>210 | G                    | -                     | 1.00E-<br>03                 | 2.20E-13                        | 5,8<br>90 | 0.8                     | 20215<br>044 |
| <i>KCNE1</i>  | rs180<br>5128      | 21                    | 358216<br>80  | G                    | -                     | 2.00E-<br>01                 | 1.40E-01                        | 589<br>0  | -<br>1.30<br>0          | 20215<br>044 |
| <i>GRIN2A</i> | rs177<br>4968<br>1 | 16                    | 971393<br>0   | C                    | 0.3<br>80             | 2.10E-<br>07                 | 5.70E-01                        | 187<br>0  | 1.45<br>0               | 22342<br>860 |

|              |             |           |               |          |            |               |                  |            |             |              |
|--------------|-------------|-----------|---------------|----------|------------|---------------|------------------|------------|-------------|--------------|
| <b>KCNJ2</b> | <b>rs72</b> | <b>17</b> | <b>705257</b> | <b>T</b> | <b>0.3</b> | <b>1.10E-</b> | <b>4.20E-148</b> | <b>187</b> | <b>-</b>    | <b>22342</b> |
|              | <b>1966</b> |           | <b>20</b>     |          | <b>80</b>  | <b>10</b>     |                  | <b>0</b>   | <b>1.79</b> | <b>860</b>   |
|              | <b>9</b>    |           |               |          |            |               |                  |            | <b>0</b>    |              |

**Table S1: Previously-reported loci associated with resting Tpe interval.**

Abbreviations: SNV: single-nucleotide variation, CHR: Chromosome, BP: Position, based on HG build 19, EA: Effect allele, EAF: Effect allele frequency from discovery data,  $\beta$ : Beta, SE: Standard Error, N: number of participants, P: P-value.

The locus name indicates the gene that is in the closest proximity to the most associated SNV.

Bold indicates replicated in an independent study.

Only one genome-wide significant variant has been previously reported.

| <b>Code</b> | <b>Definition</b>                            |
|-------------|----------------------------------------------|
| I460        | Cardiac arrest with successful resuscitation |
| I461        | Sudden cardiac death, so described           |
| I469        | Cardiac arrest, unspecified                  |
| I472        | Ventricular tachycardia                      |
| I490        | Ventricular fibrillation and flutter         |
| I499        | Cardiac arrhythmia, unspecified              |

**Table S2: ICD-10 codes used in follow-up analysis**



| Locus          | SNV                 | CHR | BP        | EA     | EAF   | MALES   |       |          |       | FEMALES |       |          |       | COMBINED |       |           |       |
|----------------|---------------------|-----|-----------|--------|-------|---------|-------|----------|-------|---------|-------|----------|-------|----------|-------|-----------|-------|
|                |                     |     |           |        |       | $\beta$ | SE    | P        | N     | $\beta$ | SE    | P        | N     | $\beta$  | SE    | P         | N     |
| <i>FAAP20</i>  | rs2503715           | 1   | 2144107   | A      | 0.130 | -0.072  | 0.012 | 4.20E-10 | 30532 | -0.017  | 0.011 | 1.20E-01 | 34618 | -0.043   | 0.008 | 6.20E-08  | 65150 |
| <i>RPL22</i>   | rs10864434          | 1   | 6262231   | A      | 0.599 | -0.052  | 0.008 | 1.70E-11 | 32176 | -0.064  | 0.007 | 4.60E-18 | 36482 | -0.058   | 0.005 | 5.80E-28  | 68658 |
| <i>SSBP3</i>   | rs562408            | 1   | 54742618  | A      | 0.433 | -0.052  | 0.008 | 4.60E-12 | 32610 | -0.046  | 0.007 | 1.40E-10 | 36974 | -0.049   | 0.005 | 3.20E-21  | 69584 |
| <i>SGIP1</i>   | rs10789207          | 1   | 66991346  | T      | 0.785 | -0.083  | 0.009 | 3.30E-20 | 33160 | -0.026  | 0.009 | 2.50E-03 | 37597 | -0.054   | 0.006 | 7.50E-18  | 70757 |
| <i>MEF2D</i>   | rs1050316           | 1   | 156434703 | G      | 0.346 | -0.074  | 0.008 | 2.90E-21 | 33270 | -0.052  | 0.007 | 3.40E-12 | 37722 | -0.061   | 0.005 | 9.40E-30  | 70993 |
| <i>STRN</i>    | rs66993681          | 2   | 37118665  | C      | 0.456 | 0.026   | 0.008 | 6.50E-04 | 33012 | 0.040   | 0.007 | 3.10E-08 | 37430 | 0.033    | 0.005 | 2.20E-10  | 70441 |
| <i>SLC8A1</i>  | rs35450971          | 2   | 40754314  | T      | 0.935 | 0.034   | 0.015 | 2.30E-02 | 32988 | 0.085   | 0.014 | 5.00E-09 | 37403 | 0.062    | 0.010 | 3.30E-09  | 70392 |
| <i>SERTAD2</i> | 2:64860029_CTTCAA_C | 2   | 64860029  | CTTCAA | 0.669 | -0.032  | 0.008 | 4.70E-05 | 32360 | -0.043  | 0.008 | 1.60E-08 | 36690 | -0.037   | 0.006 | 1.40E-11  | 69050 |
| <i>GPR1</i>    | rs111520052         | 2   | 207101230 | G      | 0.988 | 0.190   | 0.034 | 2.40E-08 | 33011 | 0.056   | 0.033 | 9.10E-02 | 37429 | 0.117    | 0.024 | 7.30E-07  | 70440 |
| <i>SCN5A</i>   | rs7373065           | 3   | 38710315  | T      | 0.019 | -0.126  | 0.028 | 5.40E-06 | 31088 | -0.155  | 0.027 | 7.90E-09 | 35248 | -0.140   | 0.019 | 3.80E-13  | 66336 |
| <i>NKX2-5</i>  | rs6884881           | 5   | 172673319 | T      | 0.433 | -0.042  | 0.008 | 2.60E-08 | 32465 | -0.026  | 0.007 | 2.60E-04 | 36810 | -0.034   | 0.005 | 6.70E-11  | 69275 |
| <i>SLC35F1</i> | rs12210810          | 6   | 118653204 | G      | 0.945 | 0.124   | 0.016 | 2.60E-14 | 33432 | 0.114   | 0.016 | 2.00E-13 | 37906 | 0.118    | 0.011 | 4.60E-26  | 71338 |
| <i>HEY2</i>    | rs10457469          | 6   | 126083658 | G      | 0.476 | -0.042  | 0.007 | 1.90E-08 | 33350 | -0.009  | 0.007 | 2.20E-01 | 37813 | -0.024   | 0.005 | 1.80E-06  | 71162 |
| <i>CREB5</i>   | 7:28413064_CT_C     | 7   | 28413064  | CT     | 0.252 | 0.051   | 0.009 | 4.00E-09 | 32058 | 0.037   | 0.008 | 8.50E-06 | 36348 | 0.043    | 0.006 | 7.20E-13  | 68406 |
| <i>KCNH2</i>   | rs148064265         | 7   | 150626596 | G      | 0.792 | -0.068  | 0.009 | 1.10E-13 | 32897 | -0.050  | 0.009 | 1.70E-08 | 37299 | -0.059   | 0.006 | 1.20E-20  | 70196 |
| <i>AZIN1</i>   | rs608236            | 8   | 103928940 | A      | 0.433 | 0.033   | 0.008 | 8.50E-06 | 33025 | 0.041   | 0.007 | 1.10E-08 | 37445 | 0.038    | 0.005 | 2.80E-13  | 70471 |
| <i>ZMIZ1</i>   | rs1658323           | 10  | 80874523  | C      | 0.613 | -0.030  | 0.008 | 8.30E-05 | 32152 | -0.044  | 0.007 | 3.70E-09 | 36455 | -0.038   | 0.005 | 2.20E-12  | 68607 |
| <i>IGF1R</i>   | rs4965430           | 15  | 99268850  | C      | 0.375 | -0.045  | 0.008 | 3.70E-09 | 33110 | -0.040  | 0.007 | 9.00E-08 | 37541 | -0.042   | 0.005 | 2.00E-15  | 70650 |
| <i>LITAF</i>   | rs2080512           | 16  | 11692198  | G      | 0.548 | -0.026  | 0.007 | 4.40E-04 | 33238 | -0.041  | 0.007 | 5.80E-09 | 37686 | -0.034   | 0.005 | 2.00E-11  | 70924 |
| <i>LIG3</i>    | rs2074518           | 17  | 33324382  | C      | 0.535 | 0.042   | 0.007 | 2.40E-08 | 33432 | 0.009   | 0.007 | 1.90E-01 | 37906 | 0.025    | 0.005 | 1.60E-06  | 71338 |
| <i>KCNJ2</i>   | rs4399570           | 17  | 68479345  | G      | 0.699 | 0.148   | 0.008 | 2.20E-74 | 33301 | 0.137   | 0.008 | 7.40E-71 | 37757 | 0.142    | 0.006 | 5.30E-143 | 71058 |
| <i>PYGB</i>    | rs3787080           | 20  | 25232604  | C      | 0.741 | -0.018  | 0.009 | 3.20E-02 | 33407 | -0.051  | 0.008 | 1.50E-10 | 37878 | -0.036   | 0.006 | 6.50E-10  | 71285 |
| <i>KCNJ4</i>   | rs196064            | 22  | 38851392  | C      | 0.631 | 0.052   | 0.008 | 1.40E-11 | 33203 | 0.045   | 0.007 | 6.50E-10 | 37646 | 0.049    | 0.005 | 1.30E-20  | 70848 |

**Table S4A: Sex-stratified analyses for resting Tpe interval.**

Lead SNVs at *FAAP20*, *GPR1*, *HEY2* and *LIG3* (indicated in yellow) are male specific loci.

These variants are non-significant ( $P > 0.05$ ) in females only. They were not selected for replication in the discovery analysis, and were non-significant in the combined analyses.

| Locus              | SNV              | CHR       | BP              | EA       | EAF          | MALES        |              |                 |              | FEMALES      |              |                 |              | COMBINED     |              |                 |              |
|--------------------|------------------|-----------|-----------------|----------|--------------|--------------|--------------|-----------------|--------------|--------------|--------------|-----------------|--------------|--------------|--------------|-----------------|--------------|
|                    |                  |           |                 |          |              | $\beta$      | SE           | P               | N            | $\beta$      | SE           | P               | N            | $\beta$      | SE           | P               | N            |
| <b><i>ETS2</i></b> | <b>rs2836779</b> | <b>21</b> | <b>40322678</b> | <b>C</b> | <b>0.353</b> | <b>0.061</b> | <b>0.009</b> | <b>1.20E-10</b> | <b>24241</b> | <b>0.007</b> | <b>0.009</b> | <b>4.10E-01</b> | <b>27269</b> | <b>0.032</b> | <b>0.006</b> | <b>5.70E-07</b> | <b>51510</b> |

**Table S4B: Sex-stratified analyses for Tpe dynamics during exercise.**

Lead SNV at *ETS2* (indicated in bold type) is a male specific locus. This variant is non-significant ( $P > 0.05$ ) in females only. It was not selected for replication in the discovery analysis, and was non-significant in the combined analyses.

Abbreviations: SNV: single-nucleotide variant CHR: chromosome, BP: Base pair position, based on HG built 18, EA: effect allele, EAF: effect allele frequency,  $\beta$ : Beta in beats per minute, SE: Standard Error, N: effective number of participants, P: P-value.

| Locus        | SNV         | CHR | BP       | EA | EAF   | MALES   |       |          |       | FEMALES |       |          |       | COMBINED |       |          |       |
|--------------|-------------|-----|----------|----|-------|---------|-------|----------|-------|---------|-------|----------|-------|----------|-------|----------|-------|
|              |             |     |          |    |       | $\beta$ | SE    | P        | N     | $\beta$ | SE    | P        | N     | $\beta$  | SE    | P        | N     |
| <i>NRXN3</i> | rs77168490  | 14  | 80493255 | A  | 0.98  | -0.032  | 0.033 | 3.26E-01 | 24172 | -0.170  | 0.031 | 4.00E-08 | 27331 | -0.102   | 0.022 | 5.00E-06 | 51503 |
| <i>NOL4L</i> | rs565497590 | 20  | 31049031 | G  | 0.987 | 0.025   | 0.040 | 5.22E-01 | 23377 | 0.214   | 0.037 | 1.10E-08 | 26432 | 0.119    | 0.027 | 8.90E-06 | 49808 |

**Table S4C: Sex-stratified analyses for Tpe dynamics during recovery.**

Lead SNVs at *NRXN3* and *NOL4L* (indicated in yellow) are female specific loci. The variants were not selected for replication from the discovery analyses and were non-significant in the combined analyses.

Abbreviations: SNV: single-nucleotide variant CHR: chromosome, BP: Base pair position, based on HG built 18, EA: effect allele, EAF: effect allele frequency,  $\beta$ : Beta in beats per minute, SE: Standard Error, N: effective number of participants, P: P-value.

| Locus  | Lead SNP   | CHR      | BP                          | eQTL SNV                    | r2 (Lead SNP-eQTL SNV) | eQTL P-value | Tissue                                | Transcript   | P <sub>12</sub> = 1 x 10 <sup>-6</sup> |                   |
|--------|------------|----------|-----------------------------|-----------------------------|------------------------|--------------|---------------------------------------|--------------|----------------------------------------|-------------------|
|        |            |          |                             |                             |                        |              |                                       |              | PP Different signal%                   | PP common signal% |
| SSBP3  | rs603901   | 1        | 54741767                    | rs590041                    | 0.990                  | 1.48E-10     | Heart_Left_Ventricle                  | SSBP3        | 6                                      | 94                |
|        |            |          |                             | rs562408                    | 0.990                  | 6.84E-23     | Heart_Atrial_Appendage                | SSBP3        | 5                                      | 95                |
| SGIP1  | rs10789207 | 1        | 66991346                    | rs72677052                  | 0.995                  | 9.43E-26     | Heart_Left_Ventricle                  | SGIP1        | 7                                      | 93                |
| NKX2-5 | rs6882776  | 5        | 172664163                   | rs6891790                   | 0.934                  | 2.29E-09     | Brain_Cerebellum                      | NKX2-5       | 9                                      | 91                |
| HEY2   | rs10457469 | 6        | 126083658                   | rs3757217                   | 0.990                  | 2.41E-13     | Brain_Anterior_cingulate_cortex_BA24  | RP11-624M8.1 | 35                                     | 60                |
|        |            |          |                             | rs1811852                   | 0.990                  | 7.87E-09     | Heart_Atrial_Appendage                | RP11-624M8.1 | 37                                     | 57                |
|        |            |          |                             | rs980014                    | 0.979                  | 4.04E-12     | Brain_Amygdala                        | RP11-624M8.1 | 32                                     | 64                |
| MSRA   | rs10283145 | 8        | 10241411                    | rs6601450                   | 0.890                  | 4.03E-08     | Brain_Hippocampus                     | RP11-981G7.6 | 40                                     | 59                |
| IGF1R  | rs2871974  | 15       | 99284074                    | rs6598541                   | 0.972                  | 5.30E-09     | Heart_Left_Ventricle                  | IGF1R        | 6                                      | 94                |
| LITAF  | rs2080512  | 16       | 11692198                    | rs735951                    | 0.992                  | 9.85E-10     | Heart_Left_Ventricle                  | LITAF        | 4                                      | 96                |
| GINS3  | rs1424077  | 16       | 58462627                    | rs2042401                   | 0.999                  | 9.62E-17     | Brain_Caudate_basal_ganglia           | RP11-481J2.2 | 8                                      | 92                |
|        |            |          |                             | rs4784934                   | 0.993                  | 1.63E-17     | Brain_Putamen_basal_ganglia           | RP11-481J2.2 | 12                                     | 88                |
|        |            |          |                             | rs9928581                   | 0.996                  | 3.15E-13     | Heart_Atrial_Appendage                | NDRG4        | 11                                     | 89                |
| LIG3   | rs2074518  | 17       | 33324382                    | rs12945428                  | 0.948                  | 7.04E-24     | Heart_Left_Ventricle                  | LIG3         | 14                                     | 83                |
|        |            |          |                             |                             |                        | 7.30E-18     | Brain_Cortex                          | LIG3         | 13                                     | 85                |
|        |            |          |                             | rs2339123                   | 0.934                  | 4.07E-10     | Brain_Anterior_cingulate_cortex_BA24  | LIG3         | 15                                     | 82                |
|        |            |          |                             |                             |                        | 2.92E-12     | Brain_Caudate_basal_ganglia           | LIG3         | 17                                     | 80                |
|        |            |          |                             |                             |                        | 5.61E-17     | Brain_Cerebellar_Hemisphere           | LIG3         | 12                                     | 85                |
|        |            |          |                             | rs1003918                   | 0.992                  | 5.61E-20     | Brain_Cerebellum                      | LIG3         | 14                                     | 84                |
|        |            |          |                             |                             |                        | 3.27E-09     | Brain_Hippocampus                     | LIG3         | 14                                     | 84                |
|        |            |          |                             | rs978202                    | 0.874                  | 2.93E-11     | Brain_Frontal_Cortex_BA9              | LIG3         | 14                                     | 84                |
|        |            |          |                             | rs1088450                   | 0.933                  | 4.01E-11     | Brain_Hypothalamus                    | LIG3         | 13                                     | 85                |
|        |            |          |                             |                             |                        | 8.12E-12     | Brain_Nucleus_accumbens_basal_ganglia | LIG3         | 12                                     | 85                |
|        |            | 2.09E-09 | Brain_Putamen_basal_ganglia | LIG3                        | 13                     | 85           |                                       |              |                                        |                   |
|        |            | 1.000    | 2.09E-09                    | Brain_Putamen_basal_ganglia | LIG3                   | 13           | 85                                    |              |                                        |                   |
|        |            |          | 8.91E-23                    | Heart_Atrial_Appendage      | LIG3                   | 12           | 85                                    |              |                                        |                   |

**Table S5: Expression quantitative trait locus (eQTL) analysis for resting Tpe interval.**

Resting Tpe variants with significant eQTLs and its corresponding genes are indicated. The results from proxy variants, with high LD ( $r^2 \geq 0.8$ ) with the lead variant in the UK Biobank study were included if there was tissue expression data in addition to the lead variant. Results were filtered to those reaching a P value  $\leq 5 \times 10^{-8}$ . The source was Genotype-Tissue Expression (GTEx) Consortium v7, PubMed ID is 25954001.  $r^2$ : A measure for the linkage disequilibrium between the proxy and lead SNVs; P: P value for the association between the variant and RNA tissue expression.

Columns J and K show the posterior probability of different signal and common signal after applying colocalisation test at a prior probability of  $1 \times 10^{-6}$  that a variant is associated with both traits.

Yellow rows indicate loci with tissue specific eQTLs with a strong colocalisation support.

| <b>MeSH term</b> | <b>Name</b>         | <b>MeSH first level term</b> | <b>MeSH second level term</b> | <b>Nominal P value</b> | <b>False discovery rate</b> |
|------------------|---------------------|------------------------------|-------------------------------|------------------------|-----------------------------|
| A07.541          | Heart               | Cardiovascular System        | Heart                         | 1.87E-04               | <0.01                       |
| A07.541<br>.560  | Heart<br>Ventricles | Cardiovascular System        | Heart                         | 2.38E-04               | <0.01                       |
| A07.541<br>.358  | Heart Atria         | Cardiovascular System        | Heart                         | 4.45E-04               | <0.05                       |

**Table S8: DEPICT tissue enrichment across all resting Tpe loci.**

## Supplemental Methods

### Phenotypic and genetic QC

In the EST-UKB cohort, the exercise protocol was adapted according to participants' risk factors. Participants were only included in the study if they were allowed to cycle at 50% or 30% of their maximum workload (no risk to minimum risk). If the heart rate reached the pre-set maximum heart rate level (75% of age-predicted maximum heart rate), the test was stopped. Also, if the participant reported chest pain, felt faint, dizzy or unwell, the test was also stopped (<https://biobank.ctsu.ox.ac.uk/crystal/docs/Cardio.pdf>). We only included participants who terminated the exercise stress test with any discomfort and with a heart rate lower than the pre-set maximum heart rate level.

Individuals were excluded based on existing medical conditions known to affect heart rate (atrial fibrillation, history of myocardial infarction or heart failure, (supra)-ventricular tachycardia, atrioventricular nodal re-entrant tachycardia, second or third degree atrioventricular block, bundle branch block and use of a pacemaker), individuals with a previous cardiovascular event (matching the codes from Supplemental Table 1) and/or individuals on heart rate altering medications (non-dihydropyridine calcium antagonists (Anatomic Therapeutic Chemical (ATC) code C08D, digoxin (ATC code C01AA5), and amiodarone (ATC code C01BD01)). Individuals with an RR interval (inverse of heart rate) change between resting and peak exercise, or between peak exercise and recovery, less than 10 ms or poor quality ECG recording were also excluded.

Individuals with bad genotype quality, provided by UKB, i.e. high missingness or heterozygosity and discordance between the self-reported sex and the sex inferred from the genotypes were excluded<sup>1</sup>. We used the k-means function in R as a clustering algorithm, to objectively and statistically select the clusters according to information from PC1 and PC2. The k-means algorithm 'partitions the points into k groups such that the sum of squares from points to the assigned cluster centres is minimised'. Then, we applied k-means separately to

cluster according to each PC1 and PC2, and initially only with  $k=4$ , for a 4-way clustering, to correspond to the 4 main ethnic clusters within UKB: White, African, Asian and Chinese. We then created an overall clustering, according to the intersections of the PC1-kmeans clustering and the PC2-4means clustering, so that participants were only categorised as 'White' overall, if they were contained in the 'White' cluster for both PCA1 and PC2. Next, we created an overall 'Mixed/Other' cluster, for any participants, whose clustering differed between PC1 and PC2. Finally, we combined the PCA ancestry clusters with the self-reported ethnicity. Individuals were only included if the PCA-clustering results matched the self-reported ancestry. However, we count 'mixed', 'other' and 'missing' as being broad/uncertain self-reported ethnicity, which have now been validated more objectively from the genetic PCA data. We restricted our genetic analyses to individuals with European ancestry.

### Genetic analyses

For each trait, we carefully selected covariates based on "a priori" physiological knowledge of the marker, and additional confounding factors were identified using linear regression. Selection of covariates was performed for each trait specifically. The main rationale is that the three traits are physiologically different. For example, resting Tpe quantifies the later stage of ventricular repolarization at rest, which is closely modulated by resting RR interval. In contrast, Tpe response to exercise and recovery quantify the changes in Tpe with exercise and recovery which highly dependent on the corresponding changes in heart rate. We also checked the influence of additional confounding factors, such as smoking, alcohol or diabetes and only included those that were significantly associated.

### ECG lead placement during the exercise test

The cardio assessment involved a 3 leads (lead I, II, and III) ECG recording (AM-USB 6.5, Cardiosoft v6.51) at a frequency of 500 Hz. The ECG was recorded using four electrodes placed on the right and left antecubital fossa and wrist (Figure R1) and stored in an xml-file of Cardiosoft (<https://biobank.ctsu.ox.ac.uk/crystal/docs/Cardio.pdf>).

### Genetic risk score analyses

Ventricular arrhythmic risk was defined as arrhythmic mortality or admission to hospital with a ventricular arrhythmic diagnosis. The exact International Classification of Diseases, Tenth Revision codes used to define ventricular arrhythmic events are presented in Table S2. Date of death was obtained from death certificates held by the National Health Service (NHS) Information Centre and the NHS Central Register Scotland for participants from England and Wales and participants from Scotland, respectively. Diagnoses were captured using the “Spell and Episode” category from the Hospital Episode Statistics records. This category contains main and secondary diagnoses, coded according to *ICD-10*, made during the hospital inpatient stay. The main diagnoses are those taken to be the main reason for hospital admission, while secondary diagnoses are more often contributory or underlying conditions. We used both the main and secondary diagnoses for recording prevalent and incident risk factors, conditions and events. Date of the event was defined as the date of the first diagnosis.

Variants with minor allele frequency  $< 0.05$  and imputation quality  $\leq 0.3$  were removed from the calculation. PRSice clumped variants to obtain SNVs in linkage equilibrium ( $r^2 < 0.1$ ) within a 250 kb window. Multiple GRSs were computed at a large number of GWAS *P*-value thresholds ranging from  $1 \times 10^{-4}$  to 0.5 with  $5 \times 10^{-5}$  increments. PRSice then performed a logistic regression analysis between each GRS and ventricular arrhythmic risk, adjusting for age, sex, diabetes, cholesterol, BMI, systolic blood pressure (SBP), the genotyping array and the 10 first genetic principal components. The optimal GRS was then chosen as the one with the smallest *P*-value.

## **Supplemental References**

1. Bycroft, C., Freeman, C., Petkova, D., Band, G., Elliott, L.T., Sharp, K., Motyer, A., Vukcevic, D., Delaneau, O., O'Connell, J., et al. (2017). Genome-wide genetic data on ~500,000 UK Biobank participants. bioRxiv.
